# Supplementary material for: Entanglements in polymer nanocomposites containing spherical nanoparticles
Source: Royal Society of Chemistry journal article supplement (doi:10.1039/c5sm02010g), 2016-01-01
Supplement: c5sm02010g1.pdf [file c5sm02010g1.pdf]

**Supplementary Material for Soft Matter**

**Entanglements in polymer nanocomposites containing spherical nanoparticles**

Argyrios Karatrantos,<sup>1</sup> Russell J. Composto,<sup>2</sup> Karen I. Winey,<sup>2</sup> and Nigel Clarke<sup>1</sup>

<sup>1</sup> *Department of Physics and Astronomy, University of Sheffield, Sheffield S3 7RH, United Kingdom*

<sup>2</sup> *Department of Materials Science and Engineering,  
University of Pennsylvania, Philadelphia, Pennsylvania, 19104, USA*

TABLE S1: Nanoparticle volume fraction  $\phi$  (%), length of the simulation cell ( $L$ ) measured in units of the monomer diameter  $\sigma_m$ , nanoparticles of radius  $R$  and *type*: repulsive (Re), attractive (A), polymer matrix:  $N = 200$ ,  $N_e$ (S-coil, S-kink, modified S-coil, M-coil), number of "kinks"  $\langle Z \rangle$  in the frozen limit, number of "kinks"  $\langle Z \rangle$ (phantom) in the phantom limit,  $L_{pp}$ : contour length of the primitive path in the frozen limit,  $L_{pp}$ (phantom): contour length of the primitive path in the phantom limit. Tube diameter  $\alpha_{pp}$  of polymers with  $N = 200$  in the nanocomposites. The error bar is the standard deviation

| $\phi$ (%) | $L(\sigma_m)$ | <i>type</i>    | (S-coil) | (S-kink) | (m.S-coil) | (M-coil) | $\langle Z \rangle$ | $\langle Z \rangle$ (phantom) | $L_{pp}$ | $L_{pp}$ (phantom) | $\alpha_{pp}$ |
|------------|---------------|----------------|----------|----------|------------|----------|---------------------|-------------------------------|----------|--------------------|---------------|
| 26.6       | 33.416        | Re ( $R = 4$ ) | 60.8±2.6 | 32.9±1.6 | 80.5±4.6   |          | 5.1±0.3             | 5±0.2                         | 37.7±0.7 | -                  | -             |
| 26.95      | 33.343        | A ( $R = 4$ )  | 62.5±3.9 | 32.6±1.5 | 83.9±7.4   | 57.4     | 5.2±0.3             | 4.9±0.1                       | 37.6±0.7 | 36.9±0.5           | 11.95         |
| 19.5       | 32.531        | Re ( $R = 4$ ) | 60.9±2.5 | 32.6±1.4 | 80.2±4.6   |          | 5.5±0.3             | 5.0±0.1                       | 36.7±1.0 | -                  | -             |
| 19.6       | 32.458        | A ( $R = 4$ )  | 60±2.4   | 32±1.3   | 78.3±4.1   | 66.4     | 5.3±0.3             | 5.1±0.2                       | 37.6±0.6 | 37.4±0.6           | 10.987        |
| 10.3       | 31.534        | Re ( $R = 4$ ) | 63.2±1.7 | 33.7±0.9 | 83.6±3.2   |          | 4.9±0.2             | 4.9±0.2                       | 36±0.6   | -                  | -             |
| 10.7       | 31.386        | A ( $R = 4$ )  | 55.2±2.2 | 32.2±1.0 | 69.8±3.8   |          | 5.2±0.2             | 5.1±0.2                       | 37.2±0.5 | 36.9±0.6           | 10.205        |
| 25.4       | 34.068        | Re ( $R = 2$ ) | 60.9±2.7 | 33.5±0.9 | 80±4.8     |          | 4.9±0.2             | 4.9±0.1                       | 36.3±4.8 | -                  | -             |
| 25.8       | 33.909        | A ( $R = 2$ )  | 66.1±2.4 | 31.8±1   | 90.7±4.7   | 64       | 5.3±0.2             | 4.5±0.2                       | 39.5±0.6 | 37.7±0.5           | 12.825        |
| 18.7       | 32.963        | Re ( $R = 2$ ) | 61.9±2.9 | 33.8±1.1 | 81.6±5.1   |          | 4.9±0.2             | 4.8±0.2                       | 36±0.6   | -                  | -             |
| 19         | 32.780        | A ( $R = 2$ )  | 64.4±2.7 | 30.3±0.9 | 88.1±5.2   | 63.4     | 5.6±0.2             | 5.1±0.2                       | 39.7±0.8 | 38.6±0.7           | 11.255        |
| 10.5       | 31.766        | Re ( $R = 2$ ) | 61±3     | 33.5±1.1 | 80.2±5.4   |          | 5±0.2               | 4.9±0.2                       | 36.1±0.8 | -                  | -             |
| 10.6       | 31.636        | A ( $R = 2$ )  | 57.6±2.2 | 32.3±1.0 | 74.5±3.8   |          | 5.2±0.2             | 5±0.2                         | 37.5±0.6 | 37.1±0.5           | 10.393        |

TABLE S2: Nanoparticle volume fraction  $\phi$  (%), nanoparticles of radius  $R = 1$  and *type*: repulsive (Re), attractive (A), polymer matrix:  $N = 200$ , Entanglement length,  $N_e$ , extracted by the M-coil estimator,  $L_{pp}$ (phantom): contour length of the primitive path in the phantom limit,  $L_{pp}$ : contour length of the primitive path in the frozen limit, Tube diameter  $\alpha_{pp}$  of polymers with  $N = 200$  in the nanocomposites. The error bar is the standard deviation.

| $\phi$ (%) | $L$    | <i>type</i> | $N_e$ (M-coil) | $L_{pp}$ (phantom) | $L_{pp}$ | $\alpha_{pp}$ |
|------------|--------|-------------|----------------|--------------------|----------|---------------|
| 36         | 38.53  | A           | 14             | -                  | 85.7     | -             |
| 22.9       | 35.267 | Re          | -              | 33.1±0.5           | 63.6±2.6 | 11.058        |
| 24.2       | 34.653 | A           | 21.2           | 37.5±0.5           | 67.6±2.3 | 14.235        |
| 17.3       | 33.831 | Re          | -              | 36±0.5             | 46.1±4.7 | 10.436        |
| 18.2       | 33.282 | A           | 33.6           | 38.1±0.7           | 56.5±4.4 | 13.1          |
| 13.8       | 33.117 | Re          | -              | 35.1±1             | 41.2±2.1 | 10.801        |
| 14.5       | 32.568 | A           | 41.9           | 37.2±0.6           | 46.7±2.9 | 11.369        |
| 10         | 32.280 | Re          | -              | 36.5±0.7           | 40.5±1.0 | 10.375        |
| 10.3       | 31.863 | A           | 49.2           | 37.5±0.6           | 42.1±0.9 | 10.608        |
| 5.4        | 31.398 | Re          | -              | 36.6±0.8           | 38.1±0.8 | 10.011        |
| 5.5        | 31.157 | A           | 55.64          | 38.3±0.6           | 39.9±0.6 | 9.879         |

TABLE S3: Contour length of the primitive path in the frozen limit,  $L_{pp}$ , in nanocomposites containing attractive nanoparticles of radius  $R = 1$  and polymer matrices  $N < 200$ . Nanoparticle volume fractions  $\phi$  (%) and polymer matrices  $N$ .

| $\phi$ (%) | $L_{pp}$     | $L_{pp}$     | $L_{pp}$     | $L_{pp}$      |
|------------|--------------|--------------|--------------|---------------|
|            | ( $N = 10$ ) | ( $N = 20$ ) | ( $N = 50$ ) | ( $N = 100$ ) |
| 36         | 4.6          | 8.7          | 21.2         | 44            |
| 24.2       | 4.1          | 7.3          | 16.8         | 33.6          |
| 18.2       | 3.8          | 5.9          | 13.7         | 29.4          |
| 14.5       | 3.9          | 6.4          | 13.2         | 25            |
| 10.3       | 3.9          | 6.2          | 12.5         | 22.8          |
| 5.5        | 3.8          | 6            | 11.7         | 21.6          |

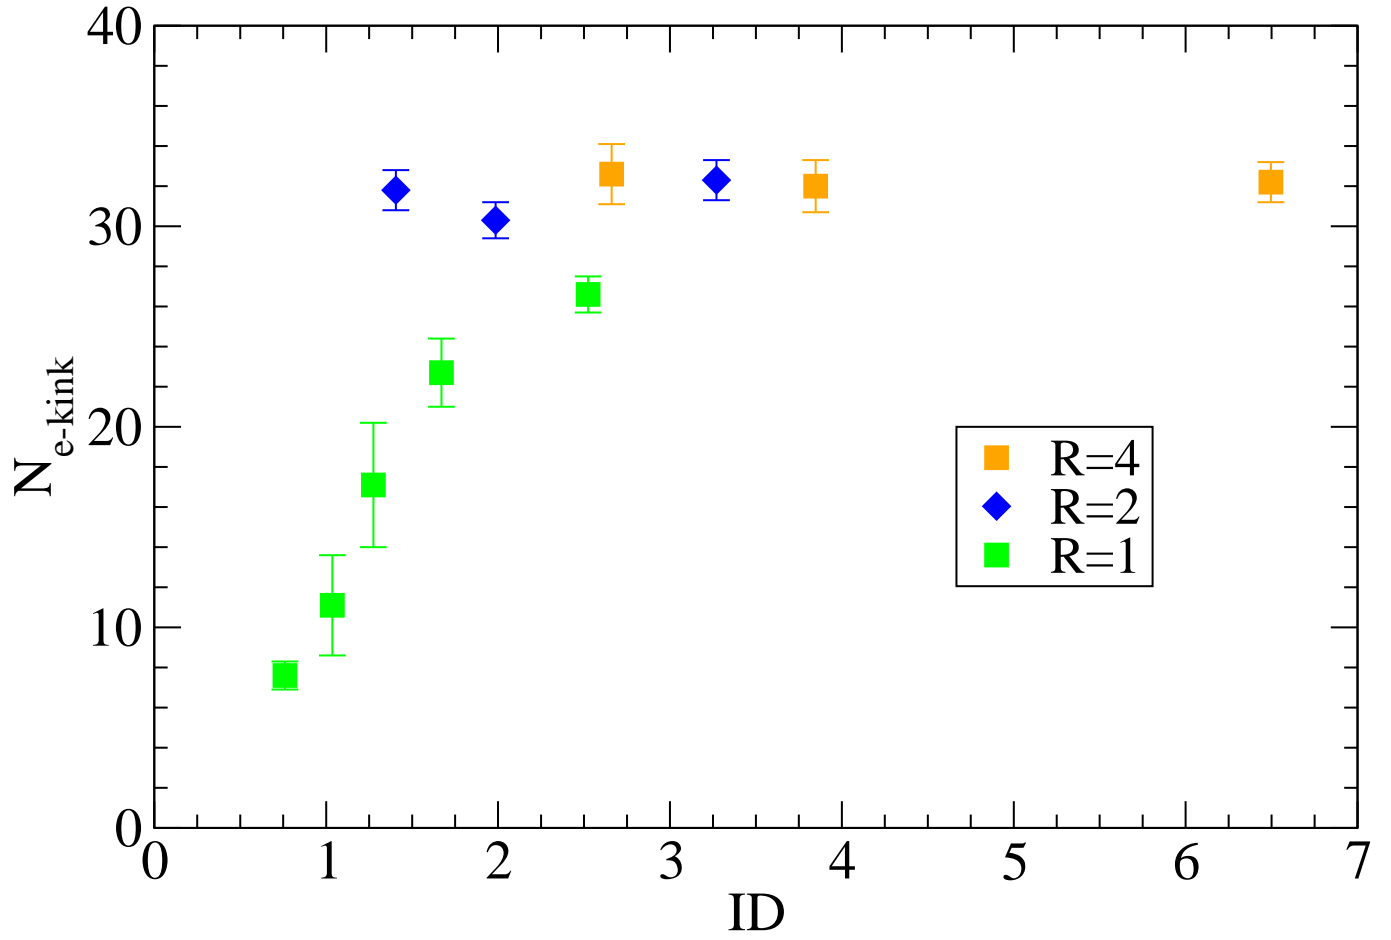

FIG. S1: Entanglement length  $N_e$  predicted by Eq.2 for the nanocomposites as a function of the interparticle distance  $ID$  for different nanoparticle sizes. Predictions of the entanglement length by Eq. 1 follow the same trends.
